# Supplementary material for: Rationally patterned electrode of direct-current triboelectric nanogenerators for ultrahigh effective surface charge density
Source: PubMed Central journal article supplement (PMC7712892; doi:10.1038/s41467-020-20045-y), 2020-12-03
Supplement: 41467_2020_20045_MOESM3_ESM.pdf [file 41467_2020_20045_MOESM3_ESM.pdf]

**Description of Additional Supplementary Files**

Supplementary Movie 1. Commercial LED bulbs were driven directly by MDC-TENG.

Supplementary Movie 2. Commercial thermo-hygrometer was driven directly by MDC-TENG.
